# Supplementary material for: Efficient green emission from transparent Tb3+–silicone hybrid materials
Source: Royal Society of Chemistry journal article supplement (doi:10.1039/c1jm11875g), 2011-01-01
Supplement: c1jm11875g.pdf [file c1jm11875g.pdf]

Supplementary material to Manuscript ID JM-ART-04-2011-011875: DTA

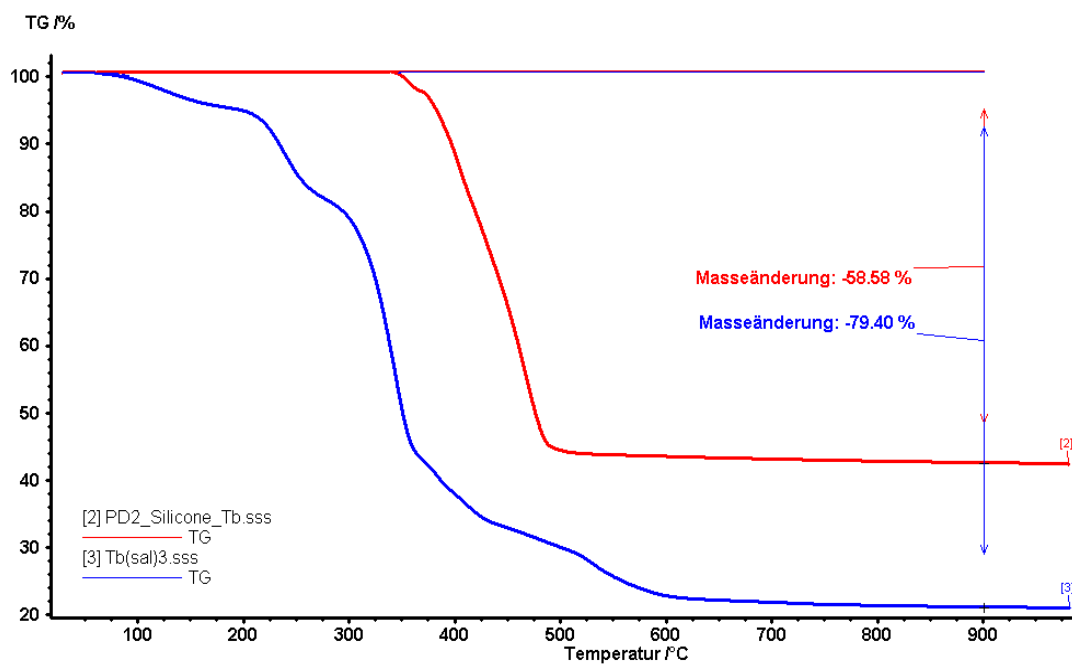

Thermogravimetical behaviour of  $Tb(sal)_3(TOPO)_2$  (blue curve) and the hybrid with silicone (0.75 % wt  $Tb(sal)_3(TOPO)_2$ ; red curve).

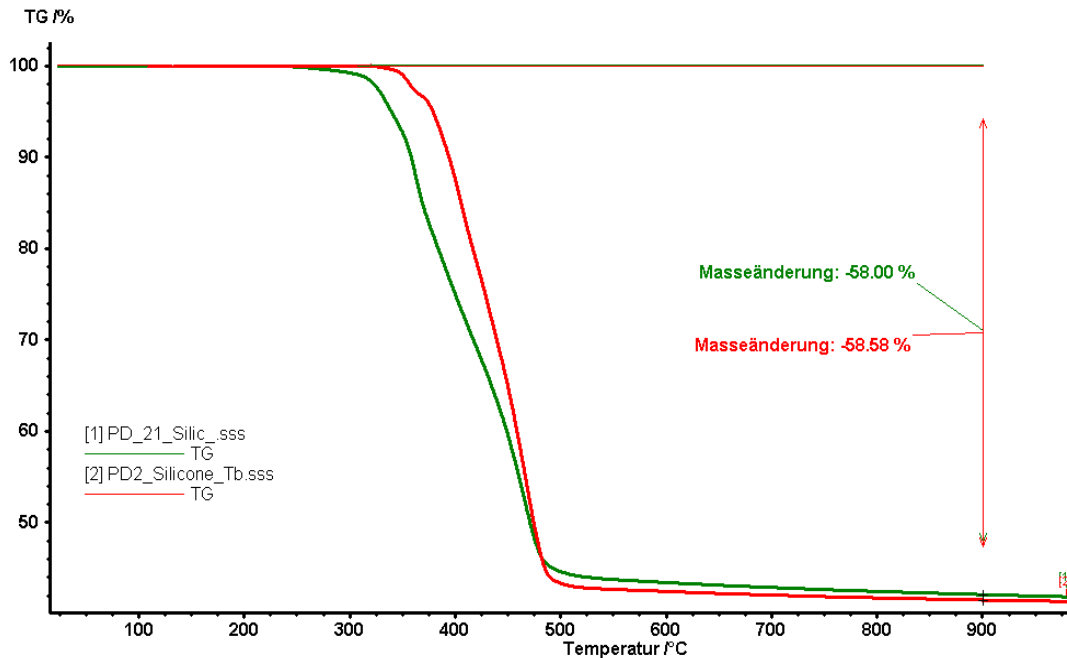

Comparison of the thermogravimetical behaviour of the pure silicon matrix (green) and the  $Tb(sal)_3(TOPO)_2$  - containing hybrid (= 0.75 % wt; red).
